# Supplementary material
Source: publisher site journal article supplement (https://www.dovepress.com/article/458427)
Supplement: Supplementary file 1 [file get_supplementary_file.php]

**Supplementary Tables**

| **Table S1. Characteristics of patients with *Acinetobacter* spp. bloodstream infection, stratified by *Acinetobacter* spp. colonization status.** | | | |
| --- | --- | --- | --- |
| **Characteristics** | **Total**  **n=46** | **Colonized**  **n=18** | **Not colonized**  **n=28** |
| **Male sex, n (%)** | 23 (50.0) | 11 (61.1) | 12 (42.9) |
| **Age,** **year, median (range)** | 24 (7-46) | 30 (9-46) | 16 (5-42) |
| **Underlying diseases, n (%)** |  |  |  |
| VSAA | 9 (19.6) | 5 (27.8) | 4 (14.3) |
| ALL | 15 (32.6) | 3 (16.7) | 12 (42.9) |
| AML | 18 (39.1) | 9 (50.0) | 9 (32.1) |
| MDS | 2 (4.3) | 1 (5.6) | 1 (3.6) |
| DLBCL | 1 (2.2) | 0 (0.0) | 1 (3.6) |
| thalassemia | 1 (2.2) | 0 (0.0) | 1 (3.6) |
| *Abbreviations:* VSAA, very severe aplastic anemia; ALL, acute lymphoblastic leukemia; AML, acute myeloid leukemia; MDS, myelodysplastic syndrome; DLCBL, diffuse large B-cell lymphoma. | | | |

| **Table S2. The results of antibiotic susceptibility testing for the eight pairs of respiratory-bloodstream carbapenem-resistant *Acinetobacter* spp. strains.** | | | | | | | | | | | | |
| --- | --- | --- | --- | --- | --- | --- | --- | --- | --- | --- | --- | --- |
|  |  | **Penicillins** | **Fluoroquinolones** | | | **Broad spectrum cephalosporins** | | | | **BLICs** | | |
| **Cases** | **Origin** | **PIP** | **CIP** | **LVX** | | **CTX** | **CAZ** | **CRO** | **FEP** | **SAM** | **TZP** | **CSL** |
| **Case 1** | RT | R | R | I | | R | I | I | R | S | R | S |
| PB | R | R | I | | R | R | R | R | S | R | S |
| **Case 2** | RT | R | R | R | | R | R | R | R | R | R | I |
| PB | R | R | R | | R | R | R | R | R | R | I |
| **Case 3** | RT | R | R | R | | R | R | R | R | R | R | R |
| PB | R | R | R | | R | R | R | R | R | R | R |
| **Case 4** | RT | R | R | R | | R | R | R | R | R | R | R |
| PB | R | R | R | | R | R | R | R | R | R | R |
| **Case 5** | RT | R | R | I | | I | I | I | R | S | R | S |
| PB | R | R | I | | I | I | I | R | S | R | S |
| **Case 6** | RT | R | R | I | | R | R | R | R | R | R | R |
| PB | R | R | I | | R | R | R | R | R | R | R |
| **Case 7** | RT | R | I | S | | R | R | I | R | I | R | S |
| PB | R | I | S | | R | R | I | R | I | R | S |
| **Case 8** | RT | R | S | S | | I | R | I | S | S | I | S |
| PB | R | S | S | | R | R | I | S | S | R | S |
|  |  | **Aminoglycosides** | | **Carbapenems** | | | **Tetracyclines** | | | | **Colistins** |  |
| **Cases** | **Origin** | **TOB** | **GEN** | **MEM** | **IPM** | **DOR** | **TCY** | **MNO** | **DOX** | **TGC** | **COL** | **TMP-SMZ** |
| **Case 1** | RT | S | R | R | R | I | S | S | S | S | S | R |
| PB | S | R | R | R | R | S | S | S | S | S | R |
| **Case 2** | RT | R | R | R | R | R | I | S | S | S | S | R |
| PB | R | R | R | R | R | S | S | S | S | S | R |
| **Case 3** | RT | R | R | R | R | R | R | S | R | S | S | S |
| PB | R | R | R | R | R | R | S | R | S | S | S |
| **Case 4** | RT | R | R | R | R | R | R | I | R | I | S | S |
| PB | R | R | R | R | R | R | R | R | I | S | S |
| **Case 5** | RT | S | R | R | R | I | S | S | S | S | S | R |
| PB | S | R | R | R | R | S | S | S | S | S | R |
| **Case 6** | RT | R | R | R | R | R | S | S | S | S | S | S |
| PB | R | R | R | R | R | S | S | S | S | S | S |
| **Case 7** | RT | S | S | R | R | R | S | S | S | I | S | S |
| PB | S | S | R | R | R | S | S | S | I | S | S |
| **Case 8** | RT | S | S | R | S | R | S | S | S | S | S | S |
| PB | S | S | R | R | R | S | S | S | S | S | S |
| *Note:* Antimicrobial susceptibility was determined according to CLSI criteria.  *Abbreviations:* RT, respiratory tract; PB, bloodstream; R, resistance; S, susceptible; I, intermediate. BLICs, β-lactam/β-lactamase inhibitor combinations; PIP, piperacillin; CIP, ciprofloxacin; LVX, levofloxacin; CTX, cefotaxime; CAZ, ceftazidime; CRO, ceftriaxone; FEP, cefepime; SAM, ampicillin-sulbactam; TZP, piperacillin-tazobactam; CSL, cefoperazone-sulbactam; TOB, tobramycin; GEN, gentamicin; MEM, meropenem; IPM, imipenem; DOR, doripenem; TCY, tetracycline; MNO, minocycline; DOX, doxycycline; TGC, tigecycline; COL, colistin; TMP-SMZ, trimethoprim-sulfamethoxazole. | | | | | | | | | | | | |
